# Supplementary material for: Facile synthesis of ultrasmall TiO2nanocrystals/porous carbon composites in large quantity and their photocatalytic performance under visible light
Source: Royal Society of Chemistry journal article supplement (doi:10.1039/c4ra05556j), 2014-07-17
Supplement: c4ra05556j1.pdf [file c4ra05556j1.pdf]

**Supporting Information**

**Facile synthesis of ultrasmall TiO<sub>2</sub> nanocrystals/porous  
carbon composites in large quantity and their photocatalytic  
performance under visible light**

Fang Cui , Linxu Xu, Tieyu Cui \*, Tongjie Yao, Jing Yu, Xiao Zhang, Kening Sun\*

*The Academy of Fundamental and Interdisciplinary Science, Harbin Institute of  
Technology, Harbin 150080, People's Republic of China*

---

\*Corresponding author. Tel.: +86-451-86403646.  
E-mail address: [cuit@hit.edu.cn](mailto:cuit@hit.edu.cn) (Tieyu Cui)

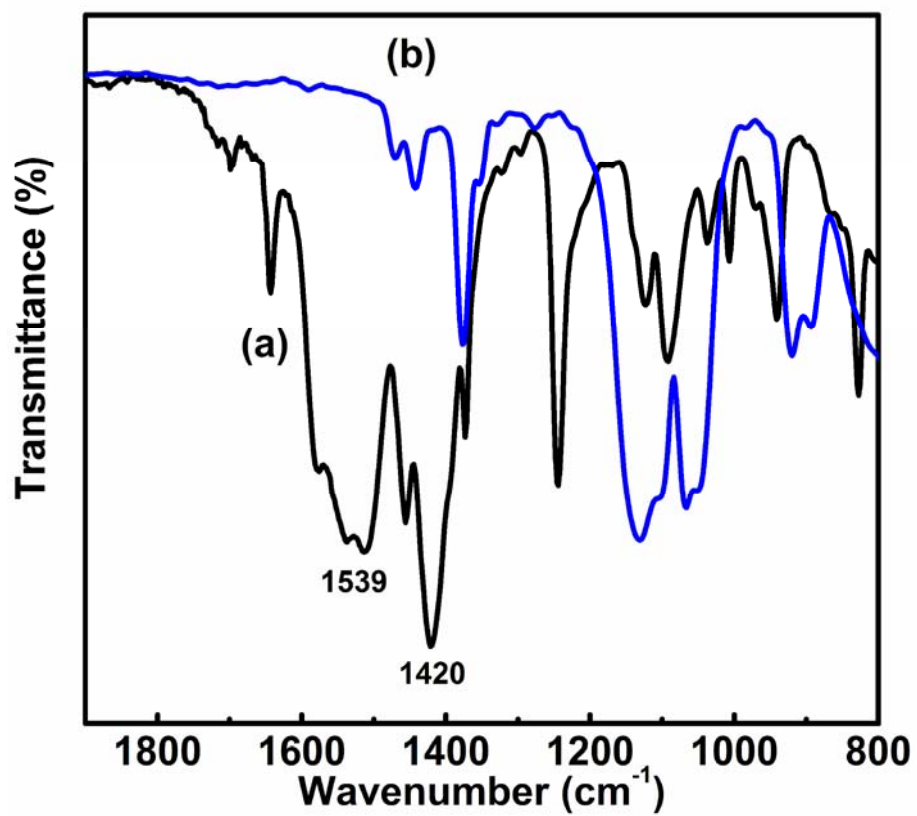

**Figure S1.** FTIR spectra of the titanium ion containing monomer (a) and  $\text{Ti}(\text{OBu})_4$  (b).

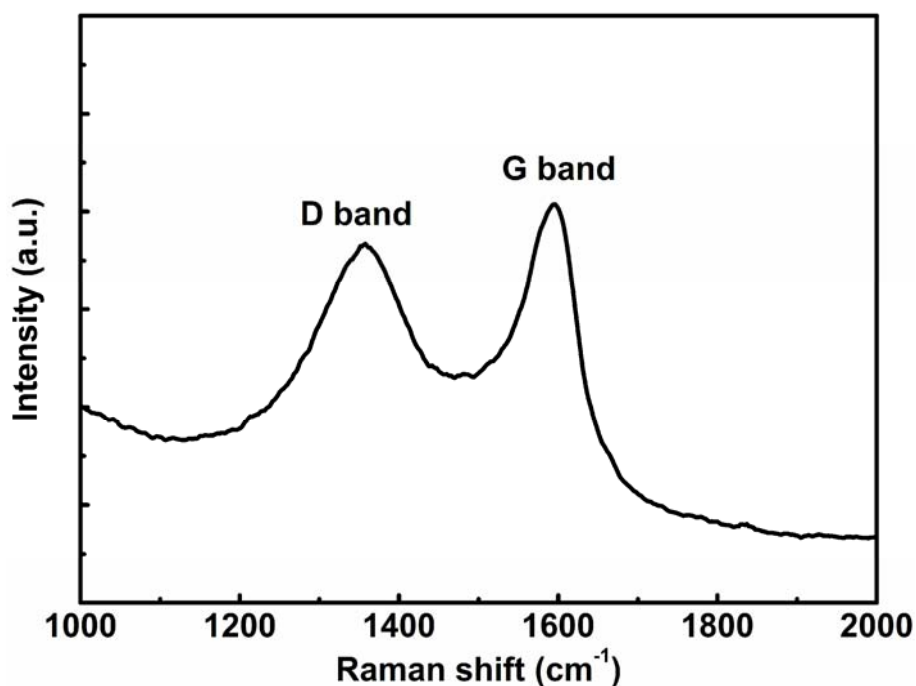

**Figure S2.** Raman spectrum of the TiO<sub>2</sub>-C-900 sample.

The presence and nature of carbon in the TiO<sub>2</sub>-C sample were also investigated by Raman spectroscopy. The carbon exhibits characteristic Raman peaks at around 1346 and 1593 cm<sup>-1</sup> which originate from the disordered and ordered graphitic carbon, respectively. The peak at around 1593 cm<sup>-1</sup> corresponds to an E<sub>2g</sub> mode of graphite, which is due to the sp<sup>2</sup>-bonded carbon atoms in two-dimensional hexagonal graphitic layer. The D band at around 1346 cm<sup>-1</sup> is associated with the presence of defects in the hexagonal graphitic layers.

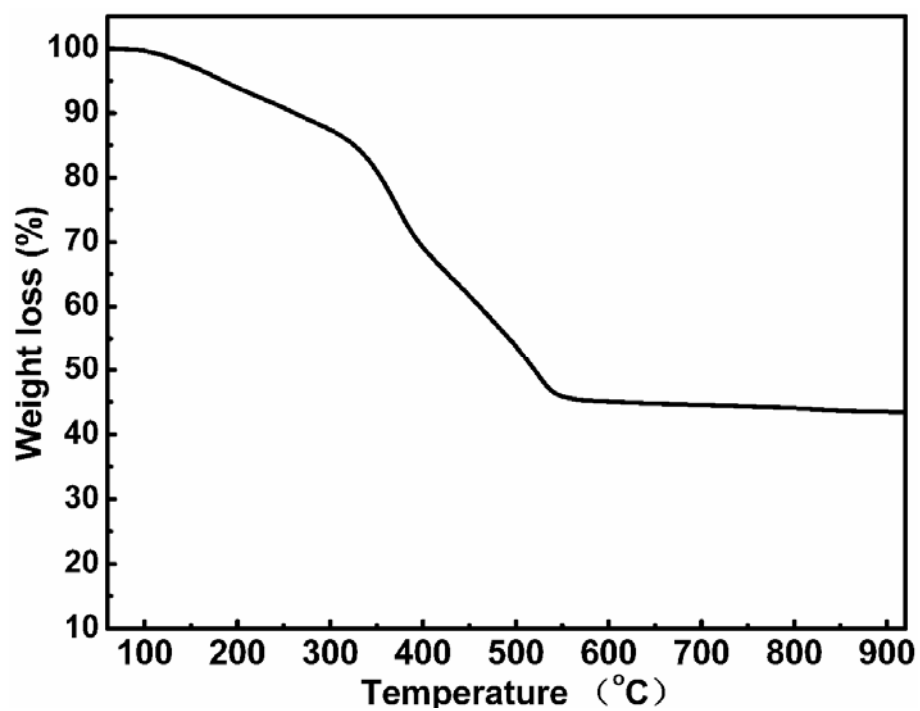

**Figure S3.** TGA curve of the titanium ion-containing polymer precursor at air atmosphere (heating rate:  $10\text{ }^{\circ}\text{C min}^{-1}$ ). The weight loss was completed around  $550\text{ }^{\circ}\text{C}$ .

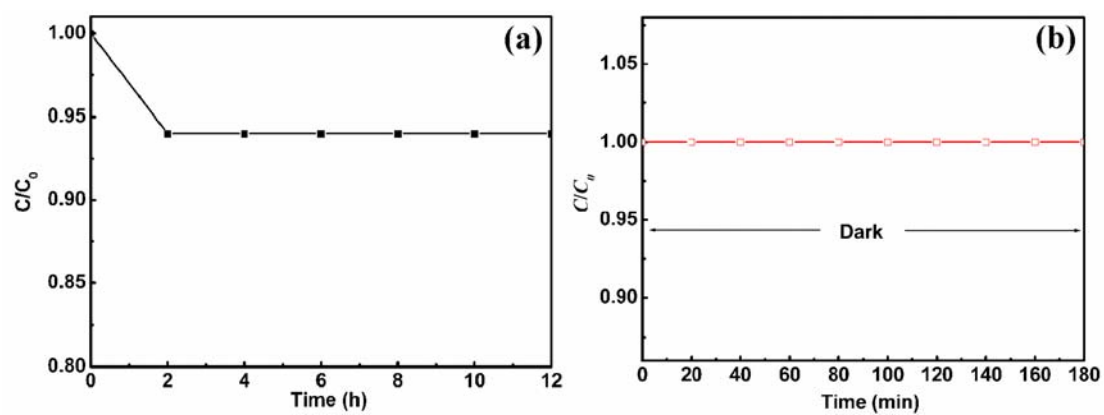

**Figure S4.** (a): the adsorption-desorption equilibrium curve of  $\text{TiO}_2\text{-C-900}$  on MB ( $2.5 \times 10^{-4} \text{ mol L}^{-1}$ ) in the dark. (b) degradation profile of MB in the presence of  $\text{TiO}_2\text{-C-900}$  but in dark.
